# Supplementary material for: An oral hydrogel carrier for delivering resveratrol into intestine-specific target released with high encapsulation efficiency and loading capacity based on structure-selected alginate and pectin
Source: Royal Society of Chemistry journal article supplement (doi:10.1039/d2fo01889f), 2022-01-01
Supplement: d2fo01889f1.pdf [file d2fo01889f1.pdf]

**An oral hydrogel carrier for delivering resveratrol into intestines-specific released with high encapsulation efficiency and loading capacity based on structure-selected alginate and pectin**

Nan Zhang<sup>a</sup>, Chuanbo Zhang<sup>b</sup>, Jiaming Liu<sup>b</sup>, Chaozhong Fan<sup>a</sup>, Jinjin Yin<sup>\*b</sup>, Tao Wu<sup>\*a</sup>

<sup>a</sup> State Key Laboratory of Food Nutrition and Safety, Tianjin University of Science & Technology, Tianjin, 300457, China

<sup>b</sup> College of Chemical Engineering and Materials Science, Tianjin University of Science & Technology, Tianjin, 300457, China

*Corresponding Author:* \*Jinjin Yin, [yinjinjin@tust.edu.cn](mailto:yinjinjin@tust.edu.cn); Tao Wu, [wutaoux@gmail.com](mailto:wutaoux@gmail.com)

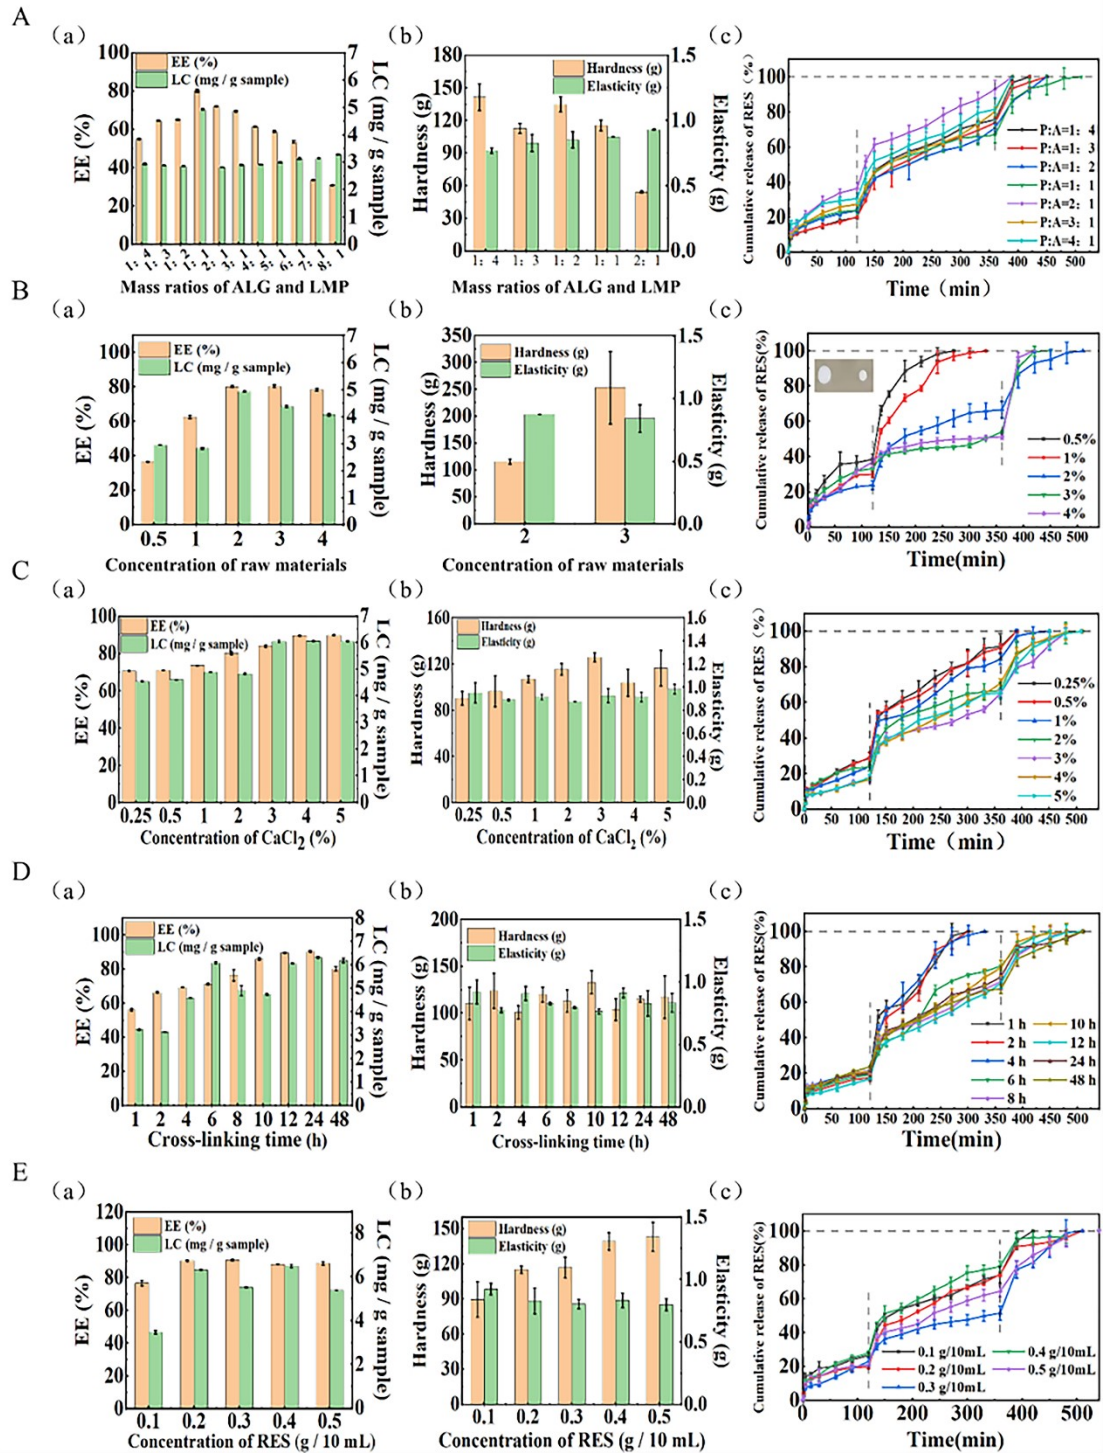

Fig. S1. Physical properties and drug release of beads. The EE%, LC, hardness and elasticity of beads made by different mass ratios of ALG and LMP (A), concentration of raw materials (B), concentration of crosslinker (C), cross-linking time (D) and concentration of RES (E), and in vitro release profile of RES.

Where, 0~2 min: simulated oral digestion, 2~120 min: simulated gastric digestion, 120~360 min: simulated small intestine digestion, and 360~480 min: simulated colonic digestion.

Note: Each digestion stage is separated by a vertical dotted line.

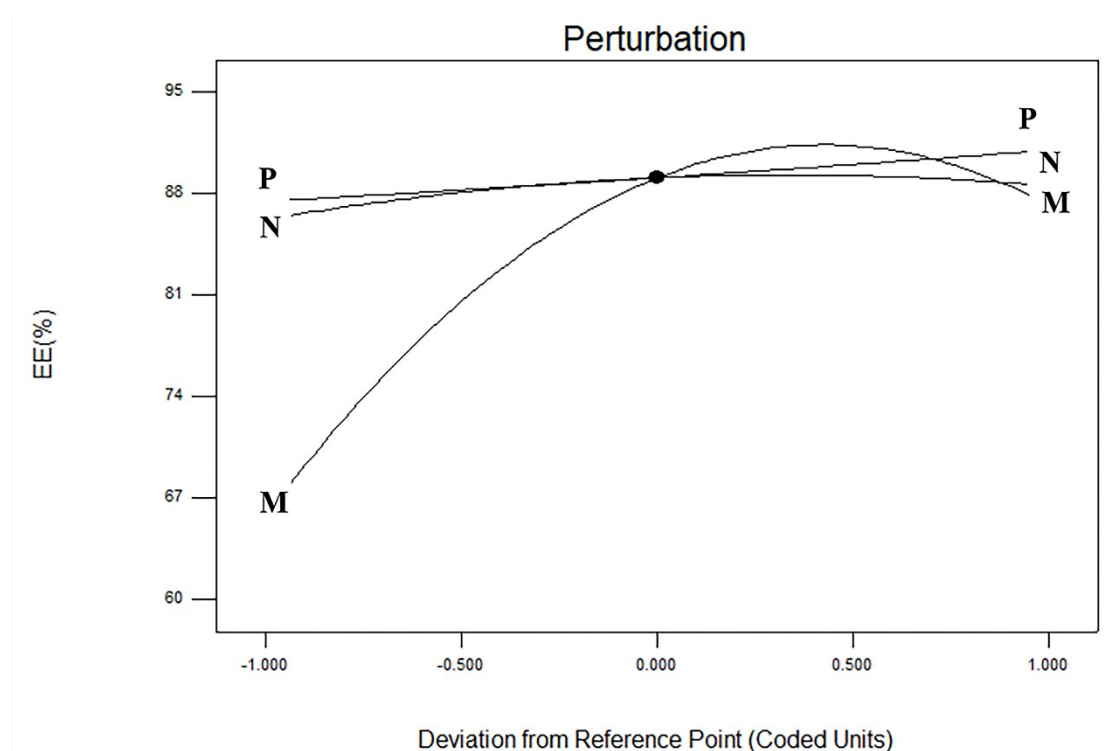

Fig. S2. Perturbation plot for interaction among influence factors on EE%. Type of factor coding: Actual. Actual factors include: the concentration of raw materials (factor M), crosslinking agent CaCl<sub>2</sub> (factor N), and RES (factor P).

Table S1 Box-Behnken factor level and process design

| Factors | level         |               |               |
|---------|---------------|---------------|---------------|
|         | -1            | 0             | 1             |
| M       | 1%            | 2%            | 3%            |
| N       | 3%            | 4%            | 5%            |
| P       | 0.2 g / 10 mL | 0.3 g / 10 mL | 0.4 g / 10 mL |

Where M, N, and P are the concentration of raw materials, crosslinking agent CaCl<sub>2</sub>, and RES, respectively.

Table S2 Experimental plan for optimization of EE% using CCD.

| group | Concentration of raw materials (%) | Concentration of CaCl <sub>2</sub> (%) | Concentration of RES (g / 10 mL) | EE (%) |
|-------|------------------------------------|----------------------------------------|----------------------------------|--------|
| 1     | 2                                  | 5                                      | 0.2                              | 89.82  |
| 2     | 1                                  | 4                                      | 0.4                              | 67.22  |
| 3     | 3                                  | 3                                      | 0.3                              | 84.79  |
| 4     | 1                                  | 3                                      | 0.3                              | 65.00  |
| 5     | 2                                  | 4                                      | 0.3                              | 91.37  |
| 6     | 2                                  | 4                                      | 0.3                              | 87.73  |
| 7     | 3                                  | 4                                      | 0.4                              | 91.81  |
| 8     | 2                                  | 4                                      | 0.3                              | 86.53  |
| 9     | 1                                  | 5                                      | 0.3                              | 64.21  |
| 10    | 2                                  | 5                                      | 0.4                              | 90.04  |
| 11    | 3                                  | 5                                      | 0.3                              | 85.21  |
| 12    | 2                                  | 3                                      | 0.2                              | 83.95  |
| 13    | 2                                  | 3                                      | 0.4                              | 86.33  |
| 14    | 1                                  | 4                                      | 0.2                              | 63.67  |
| 15    | 2                                  | 4                                      | 0.3                              | 89.99  |
| 16    | 2                                  | 4                                      | 0.3                              | 89.95  |
| 17    | 3                                  | 4                                      | 0.2                              | 83.93  |
